# Supplementary material for: Variation in Glucosinolate Accumulation among Different Sprout and Seedling Stages of Broccoli (Brassica oleracea var. italica)
Source: MDPI journal article supplement (doi:10.3390/plants11121563), 2022-06-14

Table S1. Contents of twelve GLs (mg/g DW) detected in nine cultivars of broccoli.

| Cultivar |   | GSI         | GIB         | PRO         | SIN         | GRA          | GAL         | NAP         | GIV         | GER          | GBS         | 4MGBS       | NGBS        |
|----------|---|-------------|-------------|-------------|-------------|--------------|-------------|-------------|-------------|--------------|-------------|-------------|-------------|
| BY       | A | 0.018±0.021 | 6.288±0.396 | 6.238±2.858 | 0.858±0.147 | 16.820±1.591 | 1.383±0.551 | 6.527±0.910 | 0.847±0.291 | 8.827±0.708  | 0.253±0.044 | 0.047±0.015 | 0.053±0.018 |
|          | B | 0.124±0.010 | 0.493±0.273 | 4.812±2.272 | 2.378±0.404 | 12.040±5.039 | 0.862±0.500 | 6.084±1.311 | 0.334±0.124 | 6.430±1.438  | 0.702±0.119 | 0.376±0.057 | 0.889±0.137 |
|          | C | 0.050±0.039 | 0.232±0.168 | 1.018±1.053 | 3.265±1.362 | 11.815±5.051 | 0.153±0.106 | 1.699±0.334 | 0.064±0.039 | 1.307±0.695  | 0.964±0.402 | 0.343±0.090 | 0.398±0.189 |
|          | D | 0.057±0.036 | 0.681±0.781 | 0.186±0.029 | 0.232±0.088 | 2.490±2.000  | 0.081±0.012 | 0.027±0.008 | ND          | ND           | 0.069±0.026 | 0.188±0.085 | 0.013±0.006 |
| WX       | A | 0.029±0.023 | 2.602±1.403 | 3.648±2.198 | 0.590±0.505 | 19.122±1.635 | 0.761±0.449 | 7.179±0.764 | 0.493±0.163 | 10.447±0.842 | 0.329±0.032 | 0.067±0.011 | 0.039±0.015 |
|          | B | 0.062±0.036 | 0.210±0.109 | 2.031±0.594 | 0.218±0.237 | 16.197±7.058 | 0.275±0.074 | 4.678±1.891 | 0.197±0.110 | 8.297±3.129  | 0.710±0.310 | 0.382±0.143 | 0.745±0.430 |
|          | C | 0.024±0.017 | 0.722±0.924 | 1.059±1.321 | 0.259±0.470 | 11.302±3.640 | 0.123±0.113 | 1.282±0.552 | 0.139±0.111 | 2.378±1.890  | 1.102±0.408 | 0.268±0.102 | 0.569±0.227 |
|          | D | 0.035±0.007 | 0.200±0.339 | 0.181±0.074 | ND          | 0.965±0.697  | 0.075±0.018 | 0.020±0.006 | ND          | ND           | 0.057±0.027 | 0.132±0.043 | 0.006±0.004 |
| YX       | A | 0.019±0.007 | 0.188±0.034 | ND          | 0.038±0.007 | 25.134±1.999 | 0.026±0.003 | 3.152±0.376 | 0.068±0.034 | 7.189±1.069  | 0.709±0.135 | 0.098±0.034 | 0.050±0.012 |
|          | B | 0.098±0.003 | 0.098±0.013 | ND          | 0.040±0.010 | 23.955±1.920 | 0.080±0.004 | 4.175±0.647 | 0.083±0.030 | 6.683±0.710  | 0.597±0.111 | 0.381±0.055 | 0.260±0.044 |
|          | C | 0.022±0.023 | 0.062±0.017 | 0.025±0.017 | 0.038±0.012 | 22.064±1.928 | 0.073±0.008 | 1.418±0.304 | 0.036±0.024 | 2.336±0.343  | 1.547±0.296 | 0.407±0.048 | 0.733±0.203 |
|          | D | 0.059±0.021 | 0.028±0.006 | ND          | ND          | 7.390±2.630  | 0.054±0.039 | 0.023±0.006 | 0.013±0.003 | ND           | 0.095±0.043 | 0.185±0.059 | 0.018±0.005 |
| LJ80     | A | 0.057±0.032 | 2.010±1.561 | 4.459±0.613 | 0.312±0.461 | 20.401±2.432 | 1.279±0.189 | 5.538±0.964 | 0.566±0.161 | 10.045±0.887 | 0.116±0.022 | 0.062±0.019 | 0.047±0.013 |
|          | B | 0.077±0.048 | 0.493±0.218 | 2.987±2.939 | 0.449±0.312 | 10.335±3.446 | 0.618±0.398 | 3.926±0.615 | 0.263±0.089 | 4.219±1.680  | 0.042±0.009 | 0.259±0.034 | 0.209±0.028 |
|          | C | 0.067±0.046 | 0.194±0.099 | 0.817±0.342 | 0.060±0.018 | 7.542±2.549  | 0.166±0.066 | 1.346±0.281 | 0.061±0.023 | 0.604±0.459  | 0.788±0.104 | 0.294±0.048 | 0.237±0.039 |
|          | D | 0.026±0.008 | 0.092±0.012 | 0.011±0.024 | ND          | 1.893±1.321  | 0.101±0.021 | 0.032±0.007 | 0.007±0.005 | ND           | 0.092±0.036 | 0.230±0.071 | 0.185±0.057 |
| LB       | A | 0.048±0.011 | 2.483±1.221 | 8.962±4.705 | 1.111±0.342 | 11.258±4.502 | 1.565±0.904 | 3.713±0.692 | 0.525±0.201 | 5.646±2.140  | 0.625±0.354 | 0.116±0.040 | 0.055±0.014 |
|          | B | 0.077±0.038 | 0.819±0.840 | 2.542±1.290 | 0.266±0.240 | 7.687±4.896  | 0.486±0.119 | 2.973±0.487 | 0.267±0.217 | 3.351±1.900  | 0.570±0.170 | 0.245±0.063 | 0.186±0.042 |
|          | C | 0.024±0.030 | 0.344±0.487 | 1.169±0.275 | 0.253±0.215 | 3.598±1.556  | 0.225±0.111 | 0.724±0.282 | 0.036±0.015 | 0.347±0.274  | 0.717±0.108 | 0.242±0.057 | 0.267±0.067 |
|          | D | 0.014±0.005 | 0.069±0.120 | 0.088±0.044 | 0.012±0.017 | 0.681±0.4560 | 0.072±0.008 | 0.017±0.003 | 0.008±0.003 | ND           | 0.042±0.013 | 0.138±0.037 | 0.012±0.006 |
| CQJL     | A | 0.009±0.002 | 0.454±0.048 | 0.022±0.003 | ND          | 23.560±0.760 | 0.044±0.003 | 2.437±0.363 | 0.209±0.016 | 16.602±0.898 | 1.108±0.175 | 0.111±0.014 | 0.035±0.013 |
|          | B | 0.068±0.033 | 0.141±0.030 | 0.449±0.121 | ND          | 15.233±6.017 | 0.119±0.033 | 1.443±0.754 | 0.077±0.034 | 10.099±5.068 | 0.580±0.220 | 0.208±0.057 | 0.229±0.086 |
|          | C | 0.077±0.022 | 0.098±0.019 | 0.240±0.065 | ND          | 9.131±3.203  | 0.145±0.031 | 0.113±0.075 | 0.009±0.009 | 3.613±1.285  | 0.523±0.176 | 0.175±0.047 | 0.330±0.149 |

| Cultivar |   | GSI         | GIB         | PRO          | SIN         | GRA          | GAL         | NAP         | GIV         | GER         | GBS         | 4MGBS       | NGBS        |
|----------|---|-------------|-------------|--------------|-------------|--------------|-------------|-------------|-------------|-------------|-------------|-------------|-------------|
| LJ100    | D | 0.076±0.029 | 0.089±0.026 | 0.135±0.014  | ND          | 10.236±2.718 | 0.100±0.015 | 0.020±0.002 | 0.022±0.002 | 0.690±0.346 | 0.277±0.096 | 0.241±0.051 | 0.035±0.008 |
|          | A | 0.003±0.004 | 6.048±2.520 | 5.150±2.586  | 0.361±0.374 | 15.960±4.275 | 1.589±0.821 | 6.322±1.320 | 0.542±0.308 | 8.045±2.257 | 0.187±0.048 | 0.054±0.014 | 0.033±0.004 |
|          | B | 0.045±0.007 | 2.013±0.994 | 1.594±1.410  | 0.296±0.379 | 8.614±3.222  | 0.481±0.399 | 3.824±0.876 | 0.376±0.133 | 3.191±0.973 | 0.193±0.030 | 0.153±0.012 | 0.170±0.052 |
|          | C | 0.028±0.017 | 2.074±1.735 | 0.834±1.175  | 0.065±0.082 | 8.504±4.171  | 0.168±0.116 | 1.442±0.341 | 0.081±0.054 | 1.188±0.794 | 0.537±0.207 | 0.307±0.063 | 0.211±0.032 |
| ML       | D | 0.013±0.003 | 0.183±0.215 | 0.007±0.017  | ND          | 1.870±2.982  | 0.085±0.012 | 0.023±0.005 | 0.009±0.001 | ND          | 0.044±0.056 | 0.138±0.054 | 0.011±0.006 |
|          | A | 0.018±0.011 | 3.240±1.198 | 10.579±5.539 | 1.663±0.725 | 15.329±3.767 | 1.845±0.891 | 3.570±0.852 | 0.579±0.267 | 6.621±1.365 | 0.466±0.092 | 0.158±0.027 | 0.064±0.026 |
|          | B | 0.080±0.044 | 2.185±0.643 | 4.930±4.608  | 0.915±0.487 | 17.162±2.859 | 0.791±0.645 | 2.149±1.483 | 0.364±0.146 | 5.591±0.798 | 0.453±0.096 | 0.259±0.045 | 0.452±0.093 |
|          | C | 0.053±0.011 | 1.572±0.736 | 1.778±1.033  | 0.764±0.445 | 7.676±4.170  | 0.257±0.164 | 0.127±0.165 | 0.024±0.016 | 0.439±0.187 | 1.410±0.585 | 0.275±0.063 | 0.495±0.163 |
| HJLFS    | D | 0.017±0.003 | 0.631±1.093 | 0.149±0.270  | 0.071±0.117 | 1.116±1.329  | 0.070±0.015 | 0.010±0.003 | 0.001±0.003 | 0.114±0.135 | 0.232±0.133 | 0.114±0.038 | 0.018±0.008 |
|          | A | 0.016±0.021 | 3.653±1.369 | 10.558±5.114 | 1.149±0.964 | 11.548±4.389 | 1.842±0.857 | 3.277±1.277 | 0.382±0.216 | 6.712±0.704 | 0.388±0.118 | 0.137±0.067 | 0.052±0.023 |
|          | B | 0.078±0.028 | 2.372±1.141 | 5.661±2.909  | 1.123±0.902 | 9.228±4.248  | 0.855±0.273 | 2.683±0.894 | 0.298±0.240 | 3.475±0.431 | 0.720±0.232 | 0.300±0.106 | 0.568±0.233 |
|          | C | 0.036±0.016 | 0.570±0.432 | 2.447±2.420  | 0.248±0.272 | 7.796±2.022  | 0.361±0.392 | 0.453±0.196 | 0.037±0.020 | 0.032±0.035 | 1.597±0.231 | 0.353±0.092 | 0.621±0.137 |
|          | D | 0.022±0.008 | 0.005±0.010 | 0.191±0.150  | 0.022±0.048 | 2.259±1.766  | 0.076±0.024 | 0.012±0.009 | 0.001±0.002 | ND          | 0.152±0.115 | 0.166±0.086 | 0.046±0.026 |

Values are expressed as mean ± standard deviation (SD) (n = 5), and "ND" stands for not detected.

GSI: Glucosylmybrin; GIB: Glucoiberin; PRO: Progoitrin; SIN: Sinigrin; GRA: Glucoraphanin; GAL: Glucoalyssin; NAP: Gluconapin; GIV: Glucoibervirin; GER: Glucoerucin; GBS: Glucobrassicin; MGBS: 4-Methoxyglucobrassicin; NGBS: Neoglucobrassicin.

The broccoli cultivars represented by the abbreviations listed above are as follows. BY: Biyu; WX: Wenxing; YX: Youxiu; LJ80: Lvjian80; LB: Lvbao80;

CQJL: Chunqiuji; LJ100: Lvjian100; ML: Meilv; HJLFS: Huangjinlvfushi.

A, Stage A: seeds; B, Stage B: 3-day sprouts; C, Stage C: 11-day seedlings; D, Stage D: 17-day seedlings.

Table S2. two-way ANOVA results including interactions between factors

| source                         | SS       | df  | MS       | F       | P      |
|--------------------------------|----------|-----|----------|---------|--------|
| <b>dependent variable: GSI</b> |          |     |          |         |        |
| developing stages              | .075     | 3   | .025     | 42.648  | <0.001 |
| cultivars                      | .025     | 8   | .003     | 5.291   | <0.001 |
| developing stages × cultivars  | .045     | 24  | .002     | 3.220   | <0.001 |
| error                          | .084     | 144 | .001     |         |        |
| <b>dependent variable: GIB</b> |          |     |          |         |        |
| developing stages              | 57.953   | 3   | 19.318   | 7.699   | <0.001 |
| cultivars                      | 92.082   | 8   | 11.510   | 4.587   | <0.001 |
| developing stages × cultivars  | 73.079   | 24  | 3.045    | 1.214   | .240   |
| error                          | 361.328  | 144 | 2.509    |         |        |
| <b>dependent variable: PRO</b> |          |     |          |         |        |
| developing stages              | 761.992  | 3   | 253.997  | 57.873  | <0.001 |
| cultivars                      | 431.514  | 8   | 53.939   | 12.290  | <0.001 |
| developing stages × cultivars  | 395.691  | 24  | 16.487   | 3.757   | <0.001 |
| error                          | 631.997  | 144 | 4.389    |         |        |
| <b>dependent variable: SIN</b> |          |     |          |         |        |
| developing stages              | 11.789   | 3   | 3.930    | 22.840  | <0.001 |
| cultivars                      | 45.219   | 8   | 5.652    | 32.854  | <0.001 |
| developing stages × cultivars  | 34.103   | 24  | 1.421    | 8.259   | <0.001 |
| error                          | 24.775   | 144 | .172     |         |        |
| <b>dependent variable: GRA</b> |          |     |          |         |        |
| developing stages              | 5044.870 | 3   | 1681.623 | 147.553 | <0.001 |
| cultivars                      | 2644.903 | 8   | 330.613  | 29.009  | <0.001 |
| developing stages × cultivars  | 890.166  | 24  | 37.090   | 3.254   | <0.001 |
| error                          | 1641.127 | 144 | 11.397   |         |        |
| <b>dependent variable: GAL</b> |          |     |          |         |        |
| developing stages              | 31.255   | 3   | 10.418   | 76.862  | <0.001 |
| cultivars                      | 11.100   | 8   | 1.387    | 10.236  | <0.001 |
| developing stages × cultivars  | 13.018   | 24  | .542     | 4.002   | <0.001 |
| error                          | 19.519   | 144 | .136     |         |        |
| <b>dependent variable: NAP</b> |          |     |          |         |        |
| developing stages              | 630.583  | 3   | 210.194  | 404.417 | <0.001 |
| cultivars                      | 124.600  | 8   | 15.575   | 29.967  | <0.001 |
| developing stages × cultivars  | 92.027   | 24  | 3.834    | 7.378   | <0.001 |
| error                          | 74.844   | 144 | .520     |         |        |
| <b>dependent variable: GIV</b> |          |     |          |         |        |
| developing stages              | 5.977    | 3   | 1.992    | 120.990 | <0.001 |
| cultivars                      | 1.097    | 8   | .137     | 8.325   | <0.001 |
| developing stages × cultivars  | 1.507    | 24  | .063     | 3.814   | <0.001 |
| error                          | 2.371    | 144 | .016     |         |        |

| source                           | SS       | df  | MS      | F       | P      |
|----------------------------------|----------|-----|---------|---------|--------|
| <b>dependent variable: GER</b>   |          |     |         |         |        |
| developing stages                | 2214.546 | 3   | 738.182 | 384.316 | <0.001 |
| cultivars                        | 442.467  | 8   | 55.308  | 28.795  | <0.001 |
| developing stages × cultivars    | 285.317  | 24  | 11.888  | 6.189   | <0.001 |
| error                            | 276.590  | 144 | 1.921   |         |        |
| <b>dependent variable: GBS</b>   |          |     |         |         |        |
| developing stages                | 18.686   | 3   | 6.229   | 157.787 | <0.001 |
| cultivars                        | 5.157    | 8   | .645    | 16.331  | <0.001 |
| developing stages × cultivars    | 8.262    | 24  | .344    | 8.721   | <0.001 |
| error                            | 5.684    | 144 | .039    |         |        |
| <b>dependent variable: 4MGBS</b> |          |     |         |         |        |
| developing stages                | 1.241    | 3   | .414    | 112.142 | <0.001 |
| cultivars                        | .217     | 8   | .027    | 7.355   | <0.001 |
| developing stages × cultivars    | .419     | 24  | .017    | 4.727   | <0.001 |
| error                            | .531     | 144 | .004    |         |        |
| <b>dependent variable: NGBS</b>  |          |     |         |         |        |
| developing stages                | 6.423    | 3   | 2.141   | 156.901 | <0.001 |
| cultivars                        | 1.368    | 8   | .171    | 12.527  | <0.001 |
| developing stages × cultivars    | 2.999    | 24  | .125    | 9.156   | <0.001 |
| error                            | 1.965    | 144 | .014    |         |        |

SS: mean deviation sum of squares; df: degrees of freedom; MS: mean square.

GSI: Glucosylmybrin; GIB: Glucoiberin; PRO: Progoitrin; SIN: Sinigrin; GRA: Glucoraphanin;

GAL: Glucoalyssin; NAP: Gluconapin; GIV: Glucoibervirin; GER: Glucoerucin; GBS:

Glucobrassicin; 4MGBS: 4-Methoxyglucobrassicin; NGBS: Neoglucobrassicin.

**Figure S1.** UPLC chromatogram of desulfo-GLs identified in HJLFS broccoli seeds. A, Glucosylsymbirin (GSI); B, Glucoiberin (GIB); C, Progoitrin (PRO); D, Sinigrin (SIN); E, Glucoraphanin (GRA); F, Glucoalyssin (GAL); G, Gluconapin (NAP); H, Glucoibervirin (GIV); I, Glucotropaeolin (GTP); J, Glucoerucin (GER); K, Glucobrassicin (GBS); L, 4-Methoxyglucobrassicin (4MGBS); M, Neoglucobrassicin (NGBS).

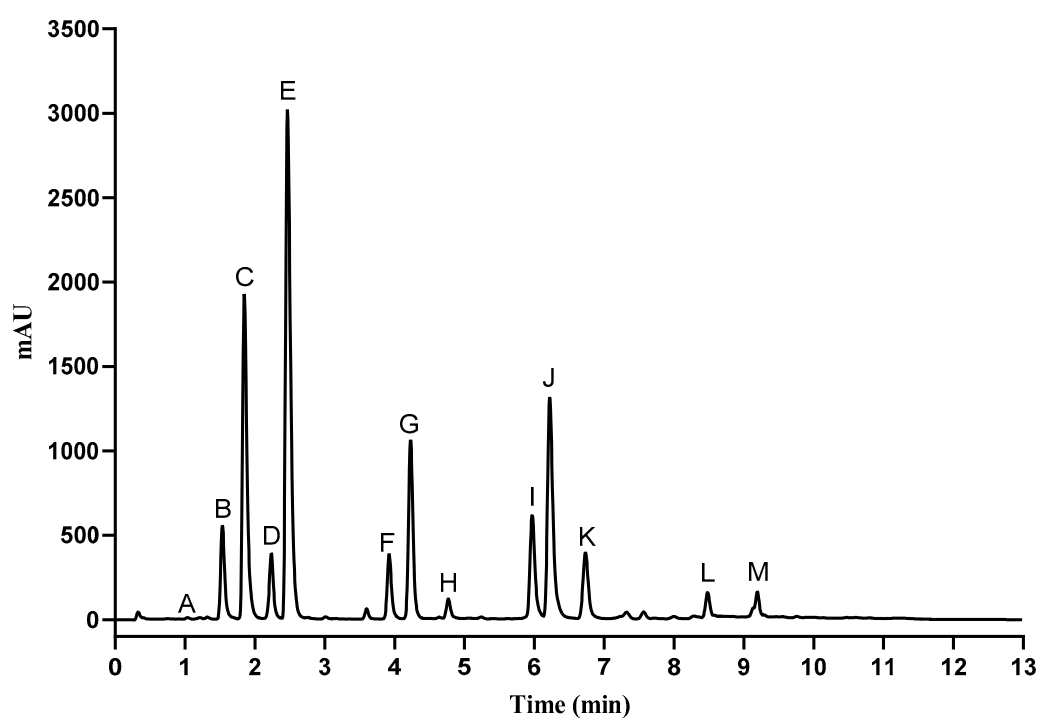

**Figure S2.** Images of broccoli at different developmental stages. **A**, Stage A: seeds; **B**, Stage B: 3-day sprouts; **C**, Stage C: 11-day seedlings; **D**, Stage D: 17-day seedlings.

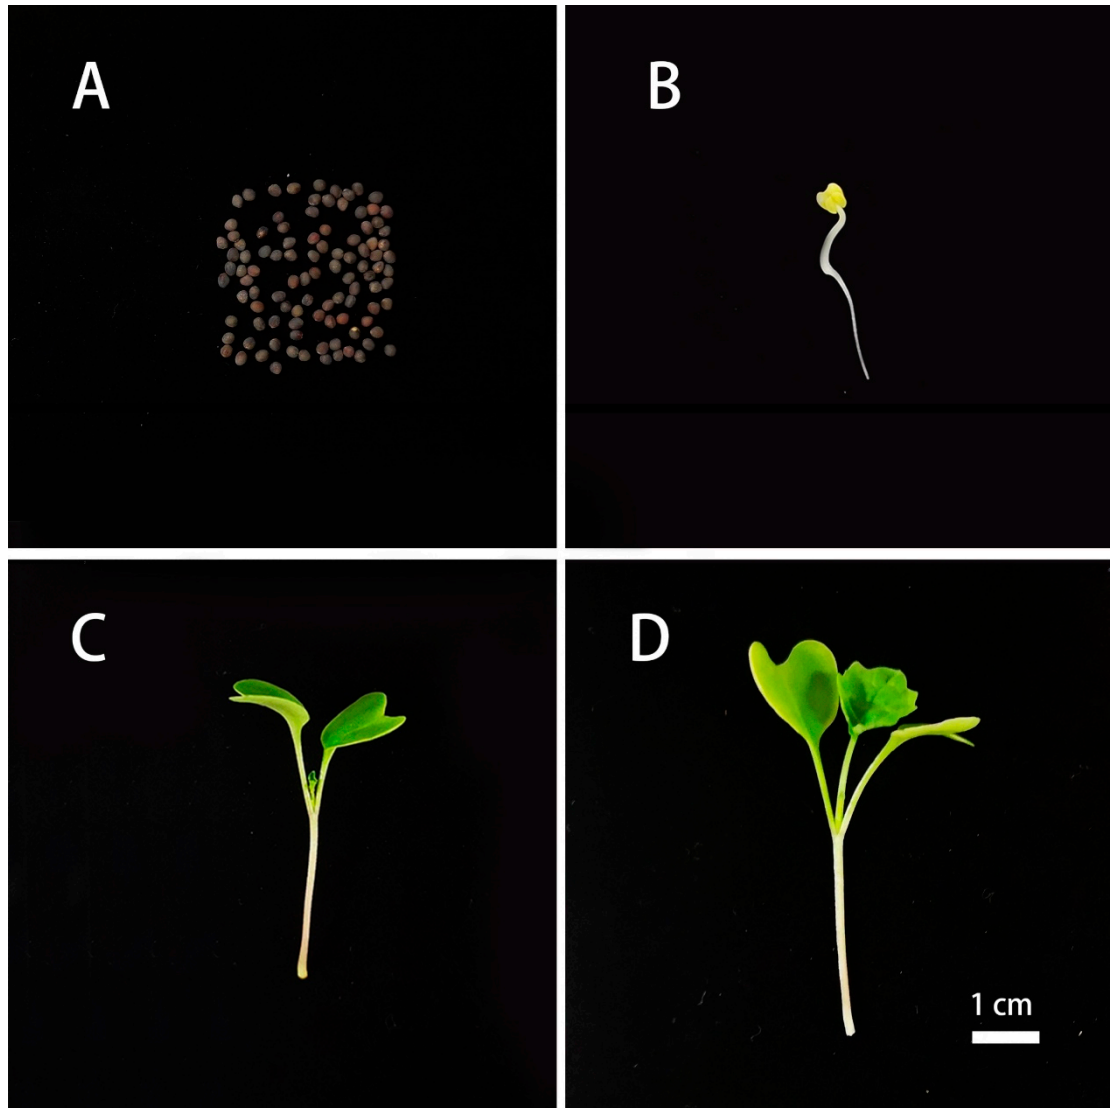

Supplement: s1 [file s1]
